# Supplementary material
Source: PubMed Central journal article supplement (PMC9088855)
Supplement: NIHMS1788152-supplement-mmc1.pdf [file NIHMS1788152-supplement-mmc1.pdf]

## Supplemental information

### **Mucus sialylation determines intestinal host-commensal homeostasis**

**Yikun Yao, Girak Kim, Samantha Shafer, Zuoqia Chen, Satoshi Kubo, Yanlong Ji, Jialie Luo, Weiming Yang, Sebastian P. Perner, Chrysi Kanellopoulou, Ann Y. Park, Ping Jiang, Jian Li, Safa Baris, Elif Karakoc Aydiner, Deniz Ertem, Daniel J. Mulder, Neil Warner, Anne M. Griffiths, Chani Topf-Olivestone, Michal Kori, Lael Werner, Jodie Ouahed, Michael Field, Chengyu Liu, Benjamin Schwarz, Catharine M. Bosio, Sundar Ganesan, Jian Song, Henning Urlaub, Thomas Oellerich, Stacy A. Malaker, Lixin Zheng, Carolyn R. Bertozzi, Yu Zhang, Helen Matthews, Will Montgomery, Han-Yu Shih, Jiansheng Jiang, Marcus Jones, Aris Baras, Alan Shuldiner, Claudia Gonzaga-Jauregui, Scott B. Snapper, Aleixo M. Muise, Dror S. Shouval, Ahmet Ozen, Kuan-Ting Pan, Chuan Wu, and Michael J. Lenardo**

## **Supplemental information**

### **Mucus sialylation determines intestinal host-commensal homeostasis**

Yikun Yao, Girak Kim, Samantha Shafer, Zuojia Chen, Satoshi Kubo, Yanlong Ji, Jialie Luo, Weiming Yang, Sebastian P. Perner, Chrysi Kanellopoulou, Ann Y. Park, Ping Jiang, Jian Li, Safa Baris, Elif Karakoc Aydinler, Deniz Ertem, Daniel J. Mulder, Neil Warner, Anne M. Griffiths, Chani Topf-Olivestone, Michal Kori, Lael Werner, Jodie Ouahed, Michael Field, Chengyu Liu, Benjamin Schwarz, Catharine M. Bosio, Sundar Ganesan, Jian Song, Henning Urlaub, Thomas Oellerich, Stacy A. Malaker, Lixin Zheng, Carolyn R. Bertozzi, Yu Zhang, Helen Matthews, Will Montgomery, Han-Yu Shih, Jiansheng Jiang, Marcus Jones, Aris Baras, Alan Shuldiner, Claudia Gonzaga-Jauregui, Scott B. Snapper, Aleixo M. Muise, Dror S. Shouval, Ahmet Ozen, Kuan-Ting Pan, Chuan Wu, and Michael J. Lenardo

**Table S1. Clinical Features of ST6GALNAC1-Deficient Patients, related to Figure 4.**

| <b>Patient</b>               | <b>Pt 1</b>                                                        | <b>Pt 2</b>                                | <b>Pt 3</b>                                                        |
|------------------------------|--------------------------------------------------------------------|--------------------------------------------|--------------------------------------------------------------------|
| <b>Age of onset (months)</b> | 18                                                                 | 18                                         | 3                                                                  |
| <b>Current Age (years)</b>   | 10                                                                 | 9                                          | 14                                                                 |
| <b>Failure to thrive</b>     | Y                                                                  | Y                                          | Y                                                                  |
| <b>Presentation</b>          | Recurrent Diarrhea                                                 | Recurrent Diarrhea                         | Oral and perianal inflammation/ulcerations, blood in stool, fever  |
| <b>Endoscopic findings</b>   | Aphthous ulcers at the terminal ileum and nodularity in the caecum | Ulcers, edema, fibrin in ileo-cecal region | Superficial ulcer in the esophagus, perianal skin tag and fissures |
| <b>Imaging findings</b>      |                                                                    |                                            | Terminal ileitis                                                   |
| <b>Histopathology</b>        |                                                                    |                                            |                                                                    |
| Eosinophil infiltration      | Ileum                                                              | Esophagus, Ileum, Colon                    | Stomach                                                            |
| Granulomas                   | ND                                                                 | Stomach, Duodenum, Ileum                   | Mouth                                                              |
| Lymphocytic Infiltration     | Colon, Rectum                                                      | Duodenum                                   | Esophagus                                                          |
| Goblet cells                 | Decrease                                                           | Decrease                                   |                                                                    |
| Cryptitis                    | Rectum                                                             | Ileum                                      |                                                                    |

**Table S2. Clinical hematological and immune parameters, related to Figure 4.**

|                                                        | Pt. 1    | Normal ranges       | Pt. 2     | Normal ranges       | Pt. 3    | Normal ranges       |
|--------------------------------------------------------|----------|---------------------|-----------|---------------------|----------|---------------------|
| <b>Lymphocyte populations</b>                          |          |                     |           |                     |          |                     |
| <b>% (absolute number)</b>                             |          |                     |           |                     |          |                     |
| CD3                                                    | 62       | 60-83 (714-2266)    | 81 (2859) | 60-83 (714-2266)    | N.D.     | 60-83 (714-2266)    |
| CD4/CD3%                                               | 24       | 31-62 (359-1565)    | 43 (1518) | 31-62 (359-1565)    | N.D.     | 31-62 (359-1565)    |
| CD4 naïve (CD62L+/CD45RA+)                             | 49       | 7.6-37 (102-1041)   | N.D.      | 7.6-37 (102-1041)   | N.D.     | 7.6-37 (102-1041)   |
| CD4 Effector memory (CD62L-/CD45RA-)                   | 26       | 2.3-15.6 (42-225)   | N.D.      | 2.3-15.6 (42-225)   | N.D.     | 2.3-15.6 (42-225)   |
| CD4 Central Memory (CD62L+/CD45RA-)                    | 21       | 10.4-30.7 (162-614) | N.D.      | 10.4-30.7 (162-614) | N.D.     | 10.4-30.7 (162-614) |
| CD8/CD3%                                               | 28       | 11-35 (178-853)     | 33 (1165) | 11-35 (178-853)     | N.D.     | 11-35 (178-853)     |
| CD8 naïve (CD62L+/CD45RA+)                             | 29       | 5.7-19.7 (85-568)   | N.D.      | 5.7-19.7 (85-568)   | N.D.     | 5.7-19.7 (85-568)   |
| CD8 Effector memory (CD62L-/CD45RA-)                   | 40       | 1.1-9.2 (24-175)    | N.D.      | 1.1-9.2 (24-175)    | N.D.     | 1.1-9.2 (24-175)    |
| CD8 Central Memory (CD62L+/CD45RA-)                    | 2        | 1.5-10.3 (25-180)   | N.D.      | 1.5-10.3 (25-180)   | N.D.     | 1.5-10.3 (25-180)   |
| CD8 TEMRA (CD62L-/CD45RA+)                             | N.D.     | 0.7-7.8 (11-172)    | N.D.      | 0.7-7.8 (11-172)    | N.D.     | 0.7-7.8 (11-172)    |
| CD4/CD8 ratio                                          | 0.85     | 1.1-5.17            | 1.3       | 1.1-5.17            | N.D.     | 1.1-5.17            |
| αβDNT Cells                                            | N.D.     | 1.3-9.2(18-185)     | N.D.      | 1.3-9.2(18-185)     | N.D.     | 1.3-9.2(18-185)     |
| CD20                                                   | 18       | 3-19% (59-329)      | 14 (494)  | 3-19% (59-329)      | N.D.     | 3-19% (59-329)      |
| Memory B cells (CD20 <sup>+</sup> /CD27 <sup>+</sup> ) | N.D.     | 0.8-3.6 (12-68)     | N.D.      | 0.8-3.6 (12-68)     | N.D.     | 0.8-3.6 (12-68)     |
| Plasma Blasts (CD20 <sup>+</sup> /CD38 <sup>+</sup> )  | N.D.     | 1.2-17.6            | N.D.      | 1.2-17.6            | N.D.     | 1.2-17.6            |
| NK                                                     | N.D.     | 6-34% (126-729)     | N.D.      | 6-34% (126-729)     | N.D.     | 6-34% (126-729)     |
| <b>Immunoglobulin levels</b>                           |          |                     |           |                     |          |                     |
| IgG mg/dL                                              | 1140     | 572-1474            | 1070      | 670-1530            | 910      | 572-1474            |
| IgM mg/dL                                              | 114      | 34-305              | 158       | 52-274              | 160      | 34-305              |
| IgA mg/dL                                              | 69       | 20-263              | 79.8      | 48-179              | 150      | 20-263              |
| IgE IU/mL                                              | 16       | 0-90                | 289       | <52                 | 41       | 0-90                |
| <b>WBC</b> *10 <sup>9</sup> /L                         | 6.6      | 4.5-11              | 8.61      | 5-14.5              | 19       | 5.0-12.0            |
| <b>ANC</b> *10 <sup>9</sup> /L                         | 2.9      | 1.5-8               | 2.95      | 1.8-8               | N.D.     | 1.8-8               |
| <b>ALC</b> *10 <sup>9</sup> /L                         | 2.8      | 1.5-6.5             | 1.27      | 1.5-6.5             | N.D.     | 1.5-6.5             |
| <b>eo</b> *10 <sup>9</sup> /L                          | 0.2      | (0-0.6)             | 0.77      | (0-0.6)             | 1        | .02-5               |
| <b>Hb</b> g/L                                          | 127      | 121-172             | 135.5     | 115-135             | 118      | 110-140             |
| <b>Platelets</b> *10 <sup>9</sup> /L                   | 403      | 130-440             | 437       | 130-440             | 322      | 150-400             |
| <b>Albumin</b> g/L                                     | 47       | 33.0-46.0           | 29        | 33.0-46.0           | 38.7     | 33.0-46.0           |
| <b>CRP</b> mg/L                                        | N.D.     | <1.0                | 230       | 0-8                 | 0.4      | <1.0                |
| <b>ESR</b> mm/h                                        | 5        | <10                 | 65        | <10                 | 8        | <10                 |
| <b>Neutrophil count</b> *10 <sup>9</sup> /L            | 2.9      | 1.5-8.5             | N.D.      | 1.5-8.5             | 12.4     | 1.5-8.5             |
| <b>Lymphocyte count</b> *10 <sup>9</sup> /L            | 2.8      | 2.0-8.0             | N.D.      | 2.0-8.0             | 4.3      | 2.0-8.0             |
| <b>ANA</b>                                             | N.D.     | negative            | 1:160     | negative            | negative | negative            |
| <b>ASCA IgA</b> KEU/L                                  | negative | <20                 | N.D.      | <20                 | 1        | <20                 |
| <b>ASCA IgG</b> KEU/L                                  | positive | <20                 | 43.5      | <20                 | 10       | <20                 |
| <b>ANCA</b>                                            | negative | negative            | negative  | negative            | negative | negative            |
| <b>Neutrophil oxidative burst index</b>                | N.D.     | 32-300              | normal    | 32-300              | 303      | 32-300              |

**Abbreviations**

|       |                                                                |
|-------|----------------------------------------------------------------|
| TEMRA | Terminally differentiated effector Memory T cells              |
| αβDNT | CD4 and CD8 Double Negative alpha/beta T-cell receptor T cells |
| NK    | Natural Killer cells                                           |
| WBC   | White Blood Cells                                              |
| ANC   | Absolute Neutrophil Count                                      |
| ALC   | Absolute Lymphocyte Count                                      |
| eo    | eosinophil count                                               |
| Hb    | Hemoglobin                                                     |
| CRP   | C-Reactive Protein                                             |
| ESR   | Erythrocyte Sedimentation Rate                                 |
| ANA   | Antinuclear Antibodies                                         |
| ASCA  | Anti-Saccharomyces Cerevisiae Antibodies                       |
| ANCA  | Antineutrophil Cytoplasmic Antibodies                          |
| N.D.  | Not determined                                                 |
